# Supplementary material for: The multiple effects of polyaniline additive to improve the efficiency and stability of perovskite solar cells
Source: Royal Society of Chemistry journal article supplement (doi:10.1039/c8tc05975f), 2019-01-01
Supplement: c8tc05975f1.pdf [file c8tc05975f1.pdf]

## Supplementary Information

### **The multiple effects of polyaniline additive to improve the efficiency and stability of perovskite solar cells**

Haiying Zheng,<sup>ab</sup> Xiaoxiao Xu,<sup>ab</sup> Shendong Xu,<sup>ab</sup> Guozhen Liu,<sup>ab</sup> Shuanghong Chen,<sup>a</sup> Xianxi Zhang,<sup>c</sup>

Tingwei Chen<sup>\*d</sup> and Xu Pan<sup>\*a</sup>

<sup>a</sup>Key Laboratory of Photovoltaic and Energy Conservation Materials, Institute of Applied Technology, Hefei Institutes of Physical Science, Chinese Academy of Sciences, Hefei 230031, China.

<sup>b</sup>University of Science and Technology of China, Hefei 230026, China.

<sup>c</sup> School of Chemistry and Chemical Engineering, Shandong Provincial Key Laboratory/Collaborative Innovation Center of Chemical Energy Storage & Novel Cell Technology, Liaocheng University, Liaocheng, 252000, China.

<sup>d</sup>School of Chemistry and Chemical Engineering, Shandong University, Jinan, 250100, China.

\*Email: tingwei.chen@hotmail.com (T. Chen), xpan@rntek.cas.cn (X. Pan)

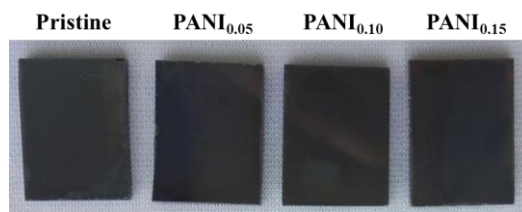

**Fig. S1** Images of pristine and perovskite films with different amounts of PANI after annealing.

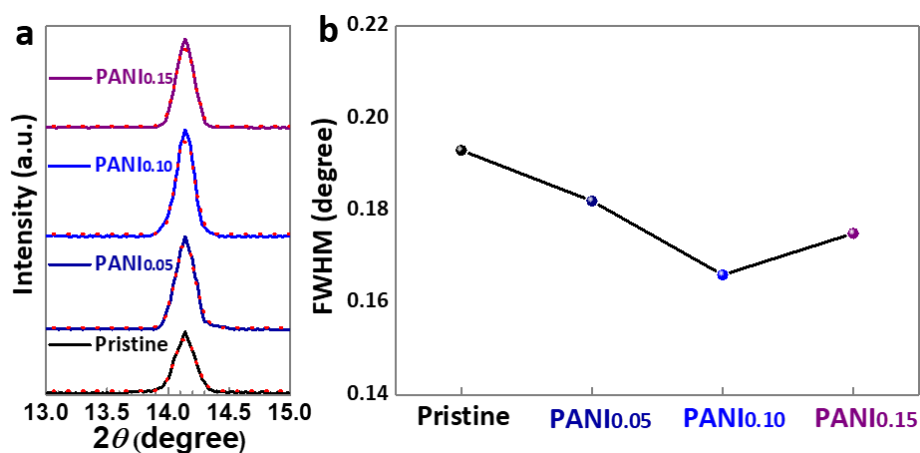

**Fig. S2** (a) The magnified XRD patterns with gaussian fit and (b) the dependence of full width at half maximum (FWHM) for the (110) peaks of pristine and perovskite films with different amounts of PANI.

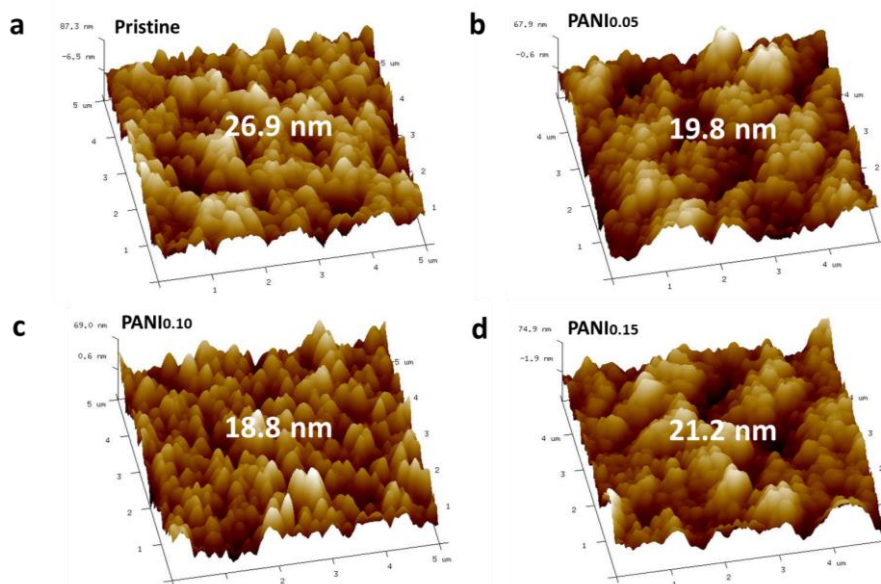

**Fig. S3** AFM images of pristine and perovskite films with different amounts of PANI.

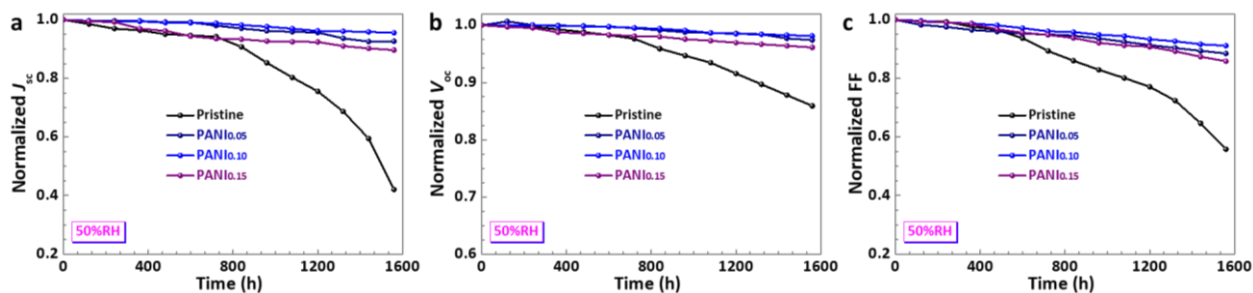

**Fig. S4** Normalized (a)  $J_{sc}$ , (b)  $V_{oc}$  and (c) FF variation curves of unsealed pristine and perovskite devices with different amounts of PANI under 50% RH.

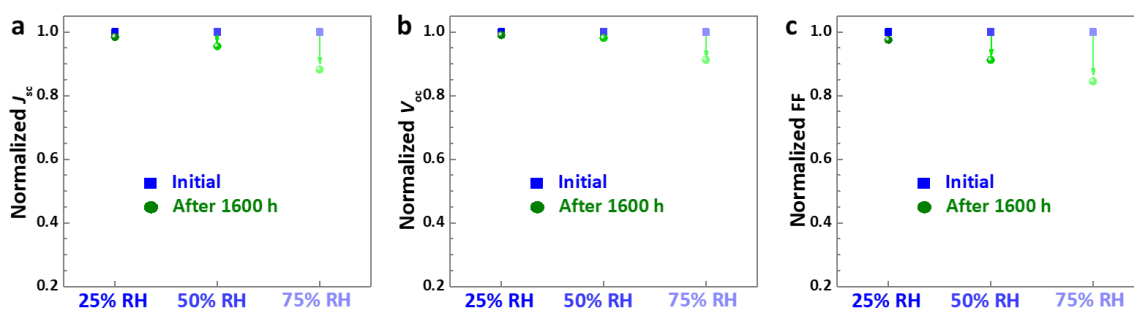

**Fig. S5** Normalized (a)  $J_{sc}$ , (b)  $V_{oc}$  and (c) FF variations of PANI<sub>0.10</sub> perovskite devices under about 25%, 50% and 75% RH.

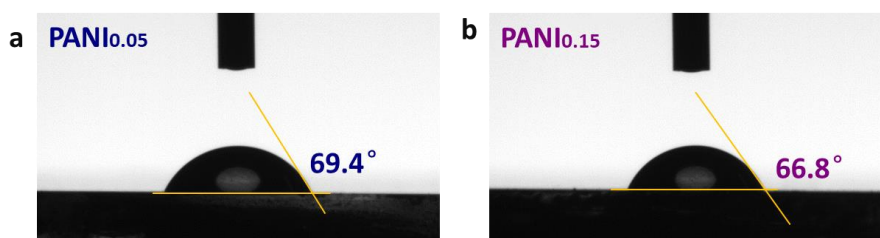

**Fig. S6** The water contact angles of PANI<sub>0.05</sub> and PANI<sub>0.15</sub> perovskite films.

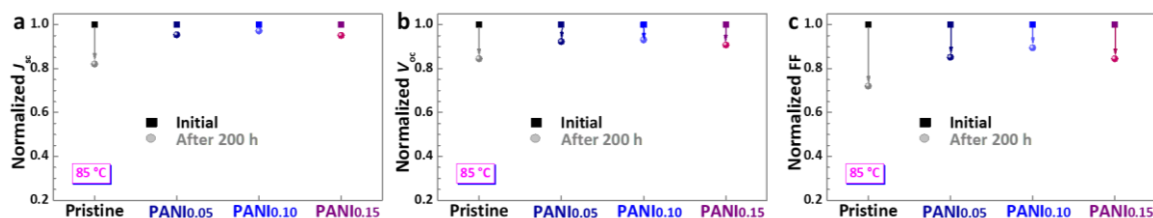

**Fig. S7** Normalized (a)  $J_{sc}$ , (b)  $V_{oc}$  and (c) FF variations of pristine and perovskite devices with different amounts of PANI at 85 °C.

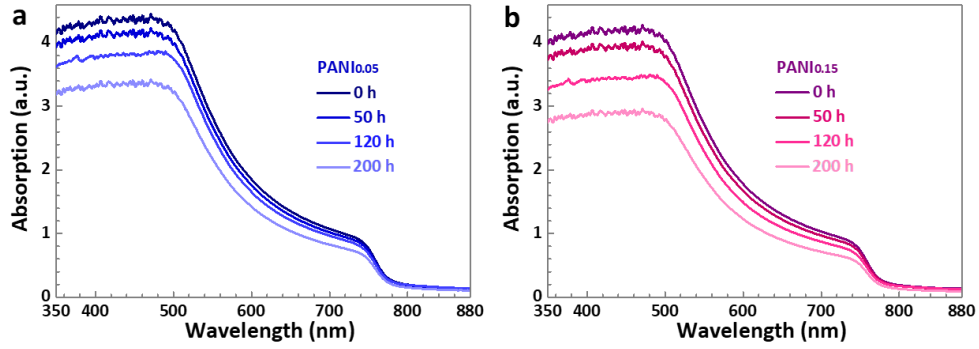

**Fig. S8** UV-vis absorption spectra of PANI<sub>0.05</sub> and PANI<sub>0.15</sub> perovskite films before and after exposure to 85 °C.

**Table S1** Photovoltaic parameters of pristine device and perovskite devices with different amounts of PANI.

| Devices              | $J_{sc}$ (mA cm <sup>-2</sup> ) | $V_{oc}$ (V) | FF (%) | PCE (%) |
|----------------------|---------------------------------|--------------|--------|---------|
| Pristine             | 22.10                           | 1.06         | 72.37  | 16.96   |
| PANI <sub>0.05</sub> | 22.46                           | 1.09         | 74.18  | 18.17   |
| PANI <sub>0.10</sub> | 22.50                           | 1.10         | 77.13  | 19.09   |
| PANI <sub>0.15</sub> | 22.38                           | 1.11         | 73.32  | 18.24   |
| PANI <sub>0.20</sub> | 22.39                           | 1.08         | 73.59  | 17.73   |
| PANI <sub>0.25</sub> | 22.16                           | 1.07         | 73.40  | 17.33   |

**Table S2** Photovoltaic parameters of pristine and PANI<sub>0.10</sub> perovskite devices under reverse and forward scan directions.

| Devices                       | $J_{sc}$ (mA cm <sup>-2</sup> ) | $V_{oc}$ (V) | FF (%) | PCE (%) |
|-------------------------------|---------------------------------|--------------|--------|---------|
| Pristine-Reverse              | 22.10                           | 1.06         | 72.37  | 16.96   |
| Pristine-Forward              | 22.09                           | 1.06         | 65.69  | 15.31   |
| PANI <sub>0.10</sub> -Reverse | 22.50                           | 1.10         | 77.13  | 19.09   |
| PANI <sub>0.10</sub> -Forward | 22.44                           | 1.10         | 74.85  | 18.48   |
